# Supplementary material
Source: publisher site journal article supplement (https://www.dovepress.com/article/532179)
Supplement: Supplementary file 1 [file 532179%20revised%20supplementary%20materials.docx]

**Supplementary Figure 1**: Clinician-Reported Barriers to Treatment

Unmet needs and barriers to anti-VEGF therapy identified by ophthalmologists who regularly treat patients with nAMD or DME (N=100 responses).

**
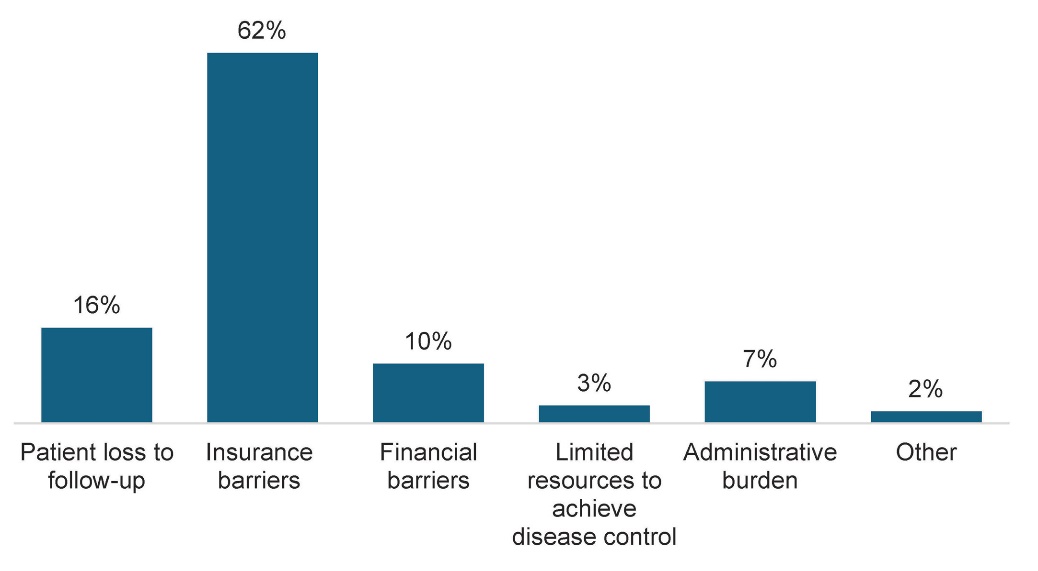
**

**Supplementary Table 1**: Patient and Clinician Survey Questions

| **Number** | **Question** |
| --- | --- |
| ***DME Survey*** | |
| 1 | Approximately how many years ago were you diagnosed with diabetes? (select only one)   - 1. < 1year   2. 1-5 years   3. 6-10 years   4. >10 years   5. Unsure |
| 2 | Approximately how many years ago were you diagnosed with diabetic macular edema (DME)? (select only one)   - 1. < 1 year   2. 1-5 years   3. 6-10 years   4. >10 years   5. Unsure |
| 3 | Prior to being diagnosed with DME, how often did you visit an eye care provider?   1. Never 2. Less than once a year 3. Once a year 4. More than once a year 5. Unsure |
| 4 | How burdensome do you find each of the following DME symptoms (4-Major burden, 3-burden, 2-mild burden, 1-no burden, N/A)   1. Blurry or double vision 2. Difficulty seeing in bright light 3. Poor night vision 4. Vision loss over time 5. Distorted objects that appear wavy 6. Floaters 7. Dark spots in your vision 8. Straight lines appearing curved or distorted |
| 5 | Which of the following treatments have you been prescribed to specifically manage your DME? (select all that apply)   1. Avastin 2. Lucentis 3. Eylea 4. Vabysmo 5. Eylea HD 6. Unsure 7. Have not received any treatment 8. Other |
| 6 | 1. Which medication are you currently receiving to manage your DME **now**? (select all that apply)    1. Avastin    2. Lucentis    3. Eylea    4. Vabysmo    5. Eylea HD    6. Unsure    7. Other    8. Have not received any treatment |
| 7 | Approximately how often do you receive injections for the treatment of your DME? (select only one)   - 1. About once every 4 weeks   2. About once every 6 weeks   3. About once every 8 weeks   4. About once every 12 weeks   5. Fewer than once every 12 weeks   6. Not currently receiving injections |
| 8 | Please indicate the extent to which you agree or disagree (4 agree strongly, 3 agree, 2 disagree, 1 disagree strongly, N/A)   - 1. I am satisfied with my current treatment plan.   2. I would like to receive fewer eye injections.   3. I believe that eye injections are necessary to prevent vision decline.   4. I was nervous to receive my first anti-VEGF injection   5. I get less nervous receiving anti-VEGF injections than I did when I first started by treatment plan   6. I have encountered insurance barriers throughout my treatment journey   7. I have shared with my doctor that getting to my appointments is difficult   8. I communicate with my doctor openly about my concerns regarding my DME and its treatment |
| 9 | Typically, how do you travel to your ophthalmology appointments? (select only one)   1. I drive myself 2. My partner or a family member drives me 3. A caregiver drives me 4. I use public transport (Uber, taxi, bus, etc) |
| 10 | Approximately how long does it take you to recover from treatments? (select only one)   - 1. About 1 hour   2. Between 2 and 6 hours   3. Between 7 to 12 hours   4. About 1 day   5. More than 1 day |
| 11 | How satisfied were you with the following (4 very satisfied, 3 somewhat satisfied, 2 somewhat unsatisfied, 1 not at all satisfied, 0 I did not receive any education/counseling, N/A)   1. The education that your ophthalmologist provided about your DME 2. The education that your ophthalmologist provided about your treatment options for your DME 3. The counseling provided by your care team on how to manage your DME 4. That your wishes and concerns are being listened to and incorporated into your DME management plan? |
| 12 | If you could change one thing about your DME management plan, what would it be? |
| 13 | 1. Overall, how many doctors’ appointments do you attend per month? (select only one)    1. 1 -2 appointments    2. 3-4 appointments    3. 5-6 appointments    4. 7-8 appointments    5. More than 9 appointments per month |
| 14 | Have you ever missed a scheduled appointment for the treatment of your DME? (select only one)   - 1. No   2. Once or twice   3. More than 2 times   4. I only go and see my ophthalmologist when my vision gets worse   5. I have not been to the ophthalmologist in the past 6 months. |
| 15 | Regarding your DME treatment, what is the greatest challenge you face? (select only one)   - 1. Travelling to the appointment   2. Time spent in doctor’s office   3. Cost of therapy   4. Fear of injections   5. Unhappiness with the vision I am receiving from my current therapy   6. Scheduling ophthalmology appointments that do not conflict with other doctors’ appointments |
| 16 | Where have you received information about DME and new therapies? (select only one)   - 1. Doctor’s office   2. Friends and family   3. From television advertising   4. From the internet (web page)   5. Social media (including YouTube)   6. From magazines and newspapers |
| 17 | Please add any additional information that you would like to share about living with DME, your treatment plan, challenges, etc. |
| 18 | In what year were you born? |
| 19 | What is your ethnicity?   - 1. African American (Black)   2. Asian   3. Caucasian (White)   4. Latino   5. Other |
| 20 | What medical insurance do you have (select all that apply)?   - 1. Private health insurance   2. Marketplace insurance   3. Public health insurance (Medicare, Medicare Advantage, or Medicaid)   4. No insurance/self-pay |
| ***nAMD Survey*** | |
| 1 | Approximately how many years ago were you diagnosed with age-related macular degeneration (nAMD)? (select only one)   - 1. < 1year   2. 1-5 years   3. 6-10 years   4. >10 years |
| 2 | Prior to being diagnosed with AMD, how often did you visit an eye care provider? (select only one)   - 1. Never   2. Once   3. Once a year   4. More than once a year   5. Unsure |
| 3 | How burdensome do you find each of the following AMD symptoms? (4-Major burden, 3-burden, 2-mild burden, 1-no burden, N/A)?   - 1. Blurred vision   2. Difficulty seeing in low light   3. Poor night vision   4. Black spots   5. Colors appearing less bright   6. Floaters   7. Loss of central vision   8. Straight lines appearing wavy |
| 4 | Which of the following treatments have you been prescribed to specifically manage your AMD? (select all that apply)   1. Avastin 2. Lucentis 3. Eylea 4. Vabysmo 5. Eylea HD 6. Unsure 7. Have not received any treatment |
| 5 | Which medication are you currently receiving to manage your AMD **now**? (select all that apply)   1. Avastin 2. Lucentis 3. Eylea 4. Vabysmo 5. Eylea HD 6. Unsure 7. Other 8. Not currently receiving treatment |
| 6 | Approximately how often do you receive injections for the treatment of your AMD? (select only one)   - 1. About once every 4 weeks   2. About once every 6 weeks   3. About once every 8 weeks   4. About once every 12 weeks   5. Fewer than once every 12 weeks |
| 7 | Please indicate the extent to which you agree or disagree (4 agree strongly, 3 agree, 2 disagree, 1 disagree strongly, N/A)   1. I am satisfied with my current treatment plan. 2. I would like to receive fewer anti-VEGF injections. 3. I was nervous to receive my first anti-VEGF injection 4. I get less nervous receiving anti-VEGF injections than I did when I first started by treatment plan 5. I have encountered insurance barriers throughout my treatment journey 6. I have shared with my doctor that getting to my appointments is difficult 7. I communicate with my doctor openly about my concerns regarding my AMD and its treatment |
| 8 | Typically, how do you travel to your ophthalmology appointments? (select only one)   1. I drive myself 2. My partner or a family member drives me 3. A caregiver drives me 4. I use public transport (Uber, taxi, bus, etc) |
| 9 | Approximately how long does it take you to recover from treatments? (select only one)   - 1. About 1 hour   2. Between 2 and 6 hours   3. Between 7 to 12 hours   4. About 1 day   5. More than 1 day |
| 10 | How satisfied were you with the following (4 very satisfied, 3 somewhat satisfied, 2 somewhat unsatisfied, 1 not at all satisfied, 0 I did not receive any education/counseling, N/A)   1. The education that your ophthalmologist provided about your AMD 2. The education that your ophthalmologist provided about your treatment options for your AMD 3. The counseling provided by your care team on how to manage your AMD 4. That your wishes and concerns are being listened to and incorporated into your AMD management plan? |
| 11 | If you could change one thing about your nAMD management plan, what would it be? |
| 12 | Overall, how many doctors’ appointments do you attend per month? (select only one)   - 1. 1 -2 appointments   2. 3-4 appointments   3. 5-6 appointments   4. 7-8 appointments   5. More than 9 appointments per month |
| 13 | Have you ever missed a scheduled appointment for the treatment of your AMD?   - 1. No   2. Once or twice   3. More than twice   4. I only go and see my ophthalmologist when my vision gets worse   5. I have not been to the ophthalmologist in the past 6 months. |
| 14 | Regarding your AMD treatment, what is the greatest challenge you face? (select only one)   - 1. Travelling to the appointment   2. Cost of therapy   3. Fear of injections   4. Unhappiness with the vision I am receiving from my current therapy   5. Scheduling ophthalmology appointments that do not conflict with other doctors’ appointments |
| 15 | Where have you received information about AMD and new therapies? (select only one)   - 1. Doctor’s office   2. Friends and family   3. From television advertising   4. From the internet (web page)   5. Social media (including YouTube)   6. From magazines and newspapers |
| 16 | Please add any additional information that you would like to share about living with AMD, your treatment plan, challenges, etc. |
| 17 | In what year were you born? If you are a caregiver, please give the year of birth of the person for whom you provide care. |
| 18 | What is your ethnicity?   - 1. African American (Black)   2. Asian   3. Caucasian (White)   4. Latino   5. Other |
| 19 | What medical insurance do you have (select all that apply)?   - 1. Private health insurance   2. Marketplace insurance   3. Public health insurance (Medicare, Medicare Advantage, or Medicaid)   4. No insurance/self-pay |
| ***Clinician Survey*** | |
| 1 | Which best describes your practice? (select only one)   - 1. Multispecialty ophthalmology practice   2. Retina specialty practice   3. Hospital   4. Other (please specify) |
| 2 | What is your practice zip code? |
| 3 | How long have you been in practice? (select only one)   - 1. 1-9 years   2. 10-20 years   3. 21-30 years   4. >30 years |
| 4 | About how many patients with retinal disease do you see per week? |
| 5 | About how many anti-VEGF injections do you administer per week? |
| 6 | How important are the following benefits of longer duration anti-VEGF agents to you? (4 very important, 3 important, 2 somewhat important, 1 not at all important)   - 1. Less fluid fluctuations over time   2. Stability of anatomy   3. Longer maintenance of drying effect   4. Better visual outcomes   5. Fewer injections   6. Decreased treatment burden   7. Other, please specify |
| 7 | How likely are you to do each of the following? (4-Very likely, 3-likely, 2-unlikely, 1-very unlikely, 0-unsure).   - 1. Switch a patient who is currently on a 1st-generation anti-VEGF to aflibercept 8mg   2. Switch a patient who is currently on 2nd-generation anti-VEGF to aflibercept 8mg |
| 8 | Do you use biosimilars in your practice? (select only one)   - 1. Yes   2. No   3. Not currently available in my practice   4. I do not intend to use biosimilars in my practice |
| 9 | How would you treat treatment naïve DME with an inadequate response to 3 monthly injections of faricimab?   - 1. Switch to aflibercept 8 mg   2. Switch to ranibizumab   3. Switch to aflibercept 2 mg   4. Switch to a steroid   5. Add a steroid   6. Continue treating with faricimab   7. Other (please specify) |
| 10 | What is the greatest barrier that you face in treating patients with retinal disease? (select only one)   - 1. Patient loss to follow-up   2. Insurance barriers (e.g., limitations due to labeling, step-protocols, limited access)   3. Financial barriers   4. Limited resources to achieve disease control   5. Administrative burden   6. Other (please specify) |
| 11 | Have you used aflibercept 8 mg in your practice? (select only one)   - 1. Yes   2. No   3. Not currently available in my practice   4. I do not intent to use aflibercept 8 mg in my practice |
| 12 | Have you used faricimab in your practice? (select only one)   - 1. Yes   2. No   3. Not currently available in my practice   4. I do not intend to use faricimab in my practice |
| 13 | Please rate your level of agreement with the following statements regarding the two new extended-dosing therapies (faricimab and aflibercept 8 mg), (4-agree strongly, 3-agree, 2-disagree, 1-disagree strongly, N/A):   - 1. I am familiar with the clinical data regarding faricimab   2. I am familiar with the clinical data regarding aflibercept 8 mg   3. The majority of patients with nAMD treated with faricimab have achieved >8 week dosing   4. The majority of patients with nAMD treated with aflibercept 8 mg have achieved >8 week dosing   5. The majority of patients with DME treated with faricimab have achieved >8 week dosing   6. The majority of patients with DME treated with aflibercept 8mg have achieved >8 week dosing with aflibercept 8mg |
| 14 | In thinking about your patients with nAMD, which extended-dosing regimen are you more likely to use for the following clinical scenarios (1- faricimab, 2- aflibercept 8 mg, 3-equally likely to use faricimab or aflibercept 8 mg, 4 – Neither faricimab nor aflibercept 8 mg, 5-unsure)   - 1. Treatment naïve, first-line (assuming step therapy is not an issue)   2. In a patient with an inadequate response to aflibercept 2 mg   3. In a patient with an inadequate response to ranibizumab   4. In a patient who has attained 8-week dosing with aflibercept 2 mg who may benefit from extended dosing   5. In a patient who has attained 8-week dosing with ranibizumab who may benefit from extended dosing   6. A patient with persistent retinal fluid |
| 15 | In thinking about your patients with DME, which extended-dosing regimen are you more likely to use for the following clinical scenarios (1- faricimab, 2- aflibercept 8 mg, 3-equally likely to use faricimab or aflibercept 8 mg, 4 – Neither faricimab or aflibercept 8 mg, 5-unsure)   - 1. Treatment naïve, first-line (assuming step therapy is not an issue)   2. In a patient with an inadequate response to aflibercept 2 mg   3. In a patient with an inadequate response to ranibizumab   4. In a patient who has attained 8-week dosing with aflibercept 2 mg who may benefit from extended dosing   5. In a patient who has attained 8-week dosing with ranibizumab who may benefit from extended dosing   6. A patient with persistent retinal fluid |
| 16 | Your patient is an 82-year-old Hispanic man who was diagnosed with nAMD 14 years ago. He has previously received bevacizumab, ranibizumab and aflibercept 2 mg. In 2018 he refuses further injections and is observed for 22 months until he develops a PED and his BCVA is 20/100-2. In late 2019 he agrees to treatment with brolucizumab and responded well. After 3 injections his BCVA is 20/70-2 but he has concerns about safety and requests to switch therapy. He is retreated with ranibizumab and receives 19 injections of ranibizumab over the next 24 months. His visual acuity drops to 20/80-2 and there is reoccurrence of intraretinal fluid. In February 2022 he is switched to faricimab and after 1 injection, there is a reduction of intraretinal fluid and his BCVA is 20/70-2. He received 12 more faricimab treatments over the course of 19 months, but he is never totally dry and his BVCA remains 20/70-2.  How would you treat this patient now?   - 1. Continue faricimab but reduce the treatment interval.   2. Retreat with a first-generation anti-VEGF agent.   3. Switch to aflibercept 8 mg.   4. Switch to a biosimilar. |
| 17 | Your patient is a 75-year-old female who reports decreased vision for approximately six weeks. She was diagnosed with non-insulin dependent diabetes 18 years ago. Her last A1C was 8.1, and she also has hypertension and hyperlipidemia. At presentation her visual acuity was 20/400 in the right eye, and 20/70 in the left. She is diagnosed with severe non-proliferative disease, and OCT shows diffuse macular edema with significant intraretinal fluid in both eyes. She is started on aflibercept 2 mg therapy and responds well. She receives 19 injections on a fixed 8-week interval over 2 years. Her visual acuity is 20/60 OD, 20/60 OS and her OCT is 248 OD, 271 OS.  How would you treat this patient now?   - 1. Continue aflibercept 2 mg therapy.   2. Switch to aflibercept 8 mg.   3. Switch to faricimab.   4. Add a corticosteroid. |
| 18 | Which, if any, limitations have you experienced in using aflibercept 8 mg? (select only one)   - 1. Mild to moderate intraocular inflammation   2. Severe intraocular inflammation   3. Lack of clarity in coding   4. Restrictions with 8-week labeling   5. Lack of real-world data to guide treatment   6. I have not encountered any limitations in using aflibercept 8 mg |
| 19 | What do you think are the greatest unmet needs in treating nAMD and DME? (open-ended) |
| 20 | To what extent do you think your patients agree with the following? (4 agree strongly, 3 agree, 2 disagree, 1 disagree strongly, N/A)   - 1. Satisfied with current treatment plan.   2. Would like to receive fewer anti-VEGF injections.   3. Believe that anti-VEGF injections are necessary to prevent vision decline.   4. Was nervous to receive my first anti-VEGF injection   5. Get less nervous receiving anti-VEGF injections than I did when I first started by treatment plan   6. Insurance barriers to access treatment   7. Getting appointments is difficult |

**Abbreviations:** BCVA, best-corrected visual acuity; DME, diabetic macular edema; N/A, not applicable; nAMD, neovascular age-related macular degeneration; OCT, optical coherence tomography; OD, oculus dexter; OS, oculus sinister; PED, pigment epithelial detachment
